# Supplementary material
Source: Springer Nature journal article supplement (https://www.springermedizin.de/resource/supplementary/12880_2014_237_MOESM6_ESM.pdf/9450302)

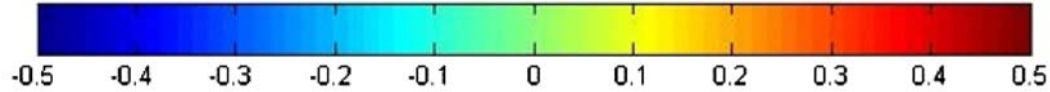

**a**

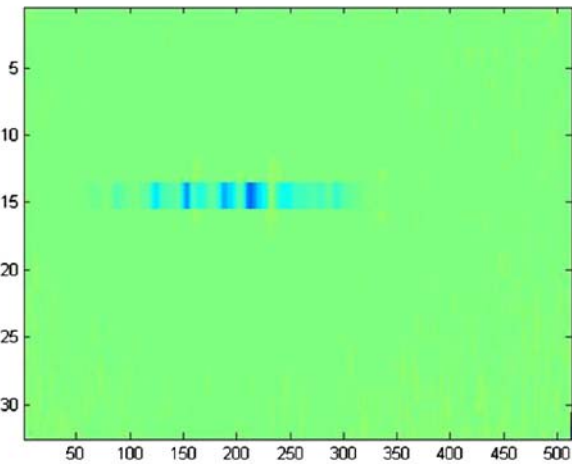

**b**

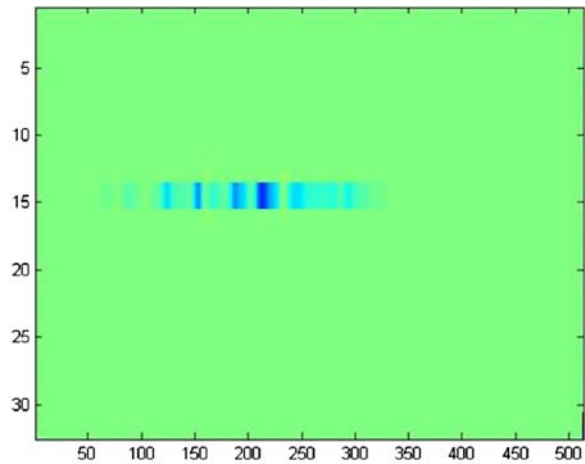

**c**

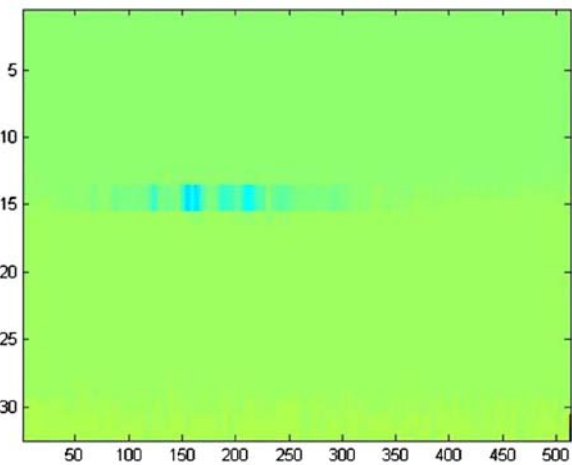

**d**

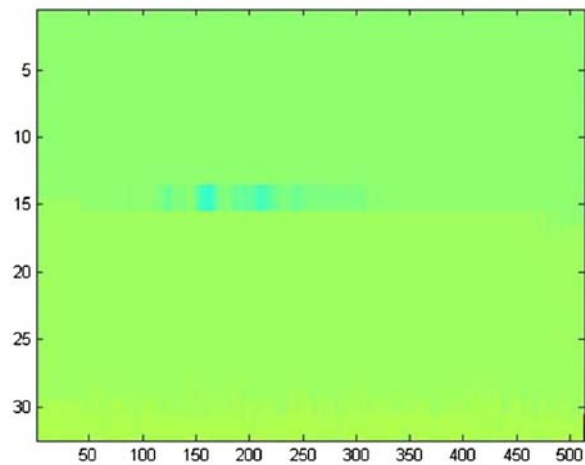

**e**

Supplement: MOESM6 [file 9450302]
